# Supplementary material
Source: HighWire-hosted journal article supplement (https://jnis.bmj.com/content/11/5/511)
Supplement: inline-supplementary-material-1 [file inline-supplementary-material-1.xlsx]

## Sheet: Feuil1
PATIENT	AGE	LOCATION	DOME	NECK	HIGHT	WEB IMPLANTED	WEB TRYED	MICROCATH	COMPLICATION	Follow up DSA	TO/NR/AR	mRs
Patient 1	60	MCA	4.55	3.43	3.53	SL4,5*2	SL4*3/SL4*2	VIA17	NO	6M	TO	0
Patient 1	60	T CAROTID	2.5	2.52	3.3	SL3*2		VIA17	NO	6M	TO	0
Patient 2	74	ACOM	8.63	5.51	7.93	SL7*4		VIA17	AVC DAYS 5 POST OP - stenting	6M	AR	4
Patient 3	58	Acho	3.2	1.8	3.4	SL4*2		VIA17	NO	6M	TO	0
Patient 4	67	ACOM	6.7	3.8	5.3	SL6*3		VIA17	NO	9M	TO	0
Patient 5	38	ACOM	5	3.5	4	SL4*3		VIA17	NO	6M	TO	0
Patient 6	34	MCA	5	6	4.5	SLS5		VIA17	NO	6M	TO	0
Patient 7	54	MCA	5.56	3.09	4.38	SL5*4		VIA17	NO	6M	TO	0
Patient 8	20	T CAROTID	4	3	4.1	SL4*3	SLS5	VIA17	NO	6M	TO	0
Patient 9	57	ACOM	3.42	3.31	4.14	SL4.5*3		VIA17	NO	3M	TO	0
Patient 9	57	ACOM	2.81	3.3	3	SL3*2		VIA17	NO	3M	TO	0
Patient 10	54	T CAROTID	5.41	3.21	6.2	SLS 5S	SLS 6S /SL 6-4	VIA17	NO	3M	TO	0
Patient 11	56	ACOM	4.32	3.8	3.17	SL4.5*2		VIA17	NO	12M	TO	0
Patient 12	72	ACOM	4.32	3.1	3.65	SL4*2		VIA17	NO	6M	AR	0
Patient 13	60	MCA	7.75	3.5	4	SL4*3		VIA17	NO	9M	TO	0
Patient 14	55	MCA	3.77	4.2	7.76	SL6*4	SL7*5	VIA17	NO	6M	TO	0
Patient 15	59	MCA	3	2.05	2.2	SL3*2		VIA17	NO	6M	TO	0
Patient 16	55	ACOM	3.36	2.48	4.87	SLS 4		VIA17	NO	6M	TO	0
Patient 17	40	MCA	4	4.3	3.83	SL 4*3		VIA17	NO	NOT DONE		0
Patient 18	71	MCA	6.01	4.37	6.78	SL 7*3	SL 6*3	VIA17	NO	6M	TO	0
Patient 19	59	MCA	4.06	3	4	SL4*3		VIA17	NO	NOT DONE		0
Patient 20	45	BA	4.91	2	1.91	SL3*2		VIA17	NO	NOT DONE		0
Patient 21	65	PICA	3.5	2.98	3.57	SL4*2	SL4.5*3	VIA17	NO	6M	TO	0
Patient 22	52	ACOM	4.5	4.21	2.49	SL5*2		VIA17	NO	6M	TO	0
Patient 23	49	MCA	2.39	3.18	3.27	SL3*2		VIA17	NO	6M	TO	0
Patient 23	49	MCA	4.85	4.79	3.31	SL5*2		VIA17	NO	6M	TO	0
Patient 24	44	MCA	4.07	3.61	4.81	SL 5*3		VIA17	NO	3M	TO	0
Patient 25	62	ACOM	4.64	3.84	5.64	SL6*4		VIA17	NO	NOT DONE		0
AVERAGE	54.5		4.50821	3.49571	4.25		6 out of 25		1 out of 25		22TO/2AR
					123.29
